# Supplementary material
Source: ML conference proceedings conference paper supplement (https://openaccess.thecvf.com/content/CVPR2021/html/Poulenard_A_Functional_Approach_CVPR_2021_paper.html)
Supplement: Supplementary file 1 [file Poulenard_A_Functional_Approach_CVPR_2021_supplemental.pdf]

# A functional approach to rotation equivariant non-linearities for Tensor Field Networks (Supplementary material).

Adrien Poulenard  
Stanford University  
padrien@stanford.edu

Leonidas J. Guibas  
Stanford University  
guibas@cs.stanford.edu

We provide a proof of theorem (3.1), we show the equivariance of the exact form of the non linearity defined in equation (16). More precisely, it commutes with the Wigner matrix.

**Theorem (3.1).** *Our continuous non linearity  $\xi(\bullet)$  is  $SO(3)$  equivariant. That is, for any rotation  $R \in SO(3)$  we have  $\xi(R.f)_{i:c}^\ell = D^\ell(R)\xi(f)_{i:c}^\ell$ .*

*Proof.* We have:

$$\begin{aligned} \xi(R.f)_{i:c}^\ell &:= \int_{\mathcal{S}_2} \xi(\mathcal{F}^+(R.f)_{ic}(x))Y^\ell(x)dx \\ &= \int_{\mathcal{S}_2} \xi \left( \sum_{\ell=0}^{\ell_{\max}} \langle D^\ell(R)f_{i:c}^\ell, Y^\ell(x) \rangle \right) Y^\ell(x)dx \\ &= \int_{\mathcal{S}_2} \xi \left( \sum_{\ell=0}^{\ell_{\max}} \langle f_{i:c}^\ell, D^\ell(R)^\top Y^\ell(x) \rangle \right) Y_m^\ell(x)dx \\ &= \int_{\mathcal{S}_2} \xi \left( \sum_{\ell=0}^{\ell_{\max}} \langle f_{i:c}^\ell, Y^\ell(R^{-1}x) \rangle \right) Y^\ell(x)dx \\ &\stackrel{t=R^{-1}x}{=} \int_{\mathcal{S}_2} \xi \left( \sum_{\ell=0}^{\ell_{\max}} \langle f_{i:c}^\ell, Y^\ell(t) \rangle \right) Y^\ell(Rt)dt \\ &= \int_{\mathcal{S}_2} \xi \left( \sum_{\ell=0}^{\ell_{\max}} \langle f_{i:c}^\ell, Y^\ell(t) \rangle \right) D^\ell(R)Y^\ell(t)dt \\ &= D^\ell(R)\xi[f]_{i:c}^\ell \end{aligned}$$

which concludes the proof.  $\square$

We provide a proof of theorem (3.2), we show that the discrete version of our non linearity defined in equation (19) is equivariant w.r.t. the rotation group of the sampling.

**Theorem (3.2).** *Our discrete non linearity  $\xi[\bullet]$  is equivariant w.r.t. the symmetry group of the sampling. That is, for any rotation  $R \in SO(3)$  in the symmetry group of the sampling  $P$  we have  $\xi[R.f]_{i:c}^\ell = D^\ell(R)\xi[f]_{i:c}^\ell$ .*

*Proof.* Let  $P = \{p_1, \dots, p_k\} \subset \mathcal{S}_2$  be our discrete sampling of the unit sphere and  $S = \{R_1, \dots, R_m\} \subset SO(3)$

its symmetry group. The action of  $S$  on  $P$  is given by permutations, that is, for all  $j$  there exist a permutation  $\sigma_j \in \mathfrak{S}_k$  such that for all  $i$ ,  $R_j p_i = p_{\sigma_j(i)}$ . We have:

$$\begin{aligned} \mathcal{F}^+(R_j.f)_{vic} &:= \mathcal{F}^+(R_j.f_{v:c})(p_i) \\ &= \sum_{\ell,m} \langle D^\ell(R_j)f_{v:c}^\ell, Y^\ell(p_i) \rangle \\ &= \sum_{\ell,m} \langle f_{v:c}^\ell, D^\ell(R_j)^\top Y^\ell(p_i) \rangle \\ &= \sum_{\ell,m} \langle f_{v:c}^\ell, D^\ell(R_j)^\top Y^\ell(p_i) \rangle \\ &= \sum_{\ell,m} \langle f_{v:c}^\ell, Y^\ell(p_{\sigma_j^{-1}(i)}) \rangle \\ &= \mathcal{F}^+(f)_{v,\sigma_j^{-1}(i),c} \end{aligned}$$

Replacing  $\mathcal{F}^+(R_j.f)_{vic}$  by  $\mathcal{F}^+(f)_{v,\sigma_j^{-1}(i),c}$  in the expression of  $\xi[R_j.f]_{i:c}^\ell$  we obtain:

$$\begin{aligned} \xi[R_j.f]_{i:c}^\ell &= \frac{4\pi}{k} \sum_{i=1}^k \xi \circ \mathcal{F}^+(R_j.f)_{vic} Y^\ell(p_i) \\ &= \frac{4\pi}{k} \sum_{i=1}^k \mathcal{F}(\xi \circ \mathcal{F}^+(f))_{v,\sigma_j^{-1}(i),c} Y^\ell(p_i) \\ &= \frac{4\pi}{k} \sum_{i=1}^k \mathcal{F}(\xi \circ \mathcal{F}^+(f))_{vic} Y^\ell(p_{\sigma_j(i)}) \\ &= \frac{4\pi}{k} \sum_{i=1}^k \mathcal{F}(\xi \circ \mathcal{F}^+(f))_{vic} Y^\ell(R_j p_i) \\ &= \frac{4\pi}{k} \sum_{i=1}^k \mathcal{F}(\xi \circ \mathcal{F}^+(f))_{vic} D^\ell(R_j) Y^\ell(p_i) \\ &= D^\ell(R_j)\xi[f]_{i:c}^\ell \end{aligned}$$

which concludes the proof.  $\square$

We propose to measure the impact of the number of samples of the Fibonacci sampling on the equivariance of our non linearity for different types of features. For any function  $f$  over the sphere expressed in the SH basis we can compute the standard deviation of the non discretized non-linearity  $\xi$  applied to  $f$  under rotations of the sphere sampling. Ideally we would like to average this standard deviation over the unit norm functions but, this infeasible as it would require sampling a high dimensional space. Instead, for each  $\ell$  we compute the average standard deviation of the image of the degree  $\ell$  spherical harmonics. For any  $k \in \mathbb{N}^*$  we denote by  $p^k = \{p_1^k, \dots, p_k^k\} \subset \mathcal{S}_2$  the Fibonacci sampling of the unit sphere with  $k$  samples. For each type  $\ell$  and  $m \in [-\ell, \ell]$  and for any rotation matrix  $R$  we define:

$$f_m^\ell(R, p^k) = \bigoplus_{q=0}^{\ell_{\max}} \frac{4\pi}{k} \sum_{i=1}^k \xi(Y_m^\ell(Rp_i^k)) Y^k(Rp_i)$$

ideally  $f_m^\ell(R, p)$  should be invariant w.r.t.  $R$ . We compute its standard deviation w.r.t.  $R$  to measure the equivariance error:

$$\begin{aligned} \mathbb{E}_R[f_m^\ell(R, p)] &:= \int_{\text{SO}(3)} f_m^\ell(R, p) dR \\ \text{Var}(\ell, k) &:= \frac{1}{2\ell + 1} \sum_{m=-\ell}^{\ell} \text{Var}_R(f_m^\ell(R, p)_m) \\ &:= \frac{1}{2\ell + 1} \sum_{m=-\ell}^{\ell} \int_{\text{SO}(3)} \|f_m^\ell(R, p) - \mathbb{E}_R[f_m^\ell(R, p)]\|_2^2 dR \end{aligned}$$

In practice we approximate the integrals by averaging over 10000 random rotations. We report the standard variation  $\sigma$  w.r.t. the degree of spherical harmonics  $\ell$  and number of samples  $k$  in Figure (1). As expected, we observe that the error is decreasing with the number of samples. Also higher frequency spherical harmonics produces higher error but, we observe a sharper decrease of the error initially for higher frequencies as we increase the number of samples.

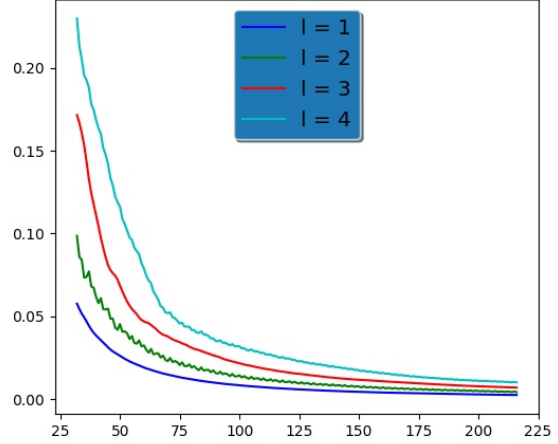

Figure 1. Average standard deviation  $\sigma(\ell, k)$  (y-axis) of our non linearity applied to degree  $\ell$  spherical harmonics under rotation of the Fibonacci sampling w.r.t. the number  $k$  of samples (x-axis). We used  $\ell_{\max} = 4$ .
